# Supplementary material for: Structures and electronic properties of VSin− (n = 14–20) clusters: a combined experimental and density functional theory study
Source: Royal Society of Chemistry journal article supplement (doi:10.1039/d2cp00619g), 2022-01-01
Supplement: d2cp00619g1.pdf [file d2cp00619g1.pdf]

## Supplementary Materials

### Structures and electronic properties of $\text{VSi}_n^-$ ( $n = 14\text{--}20$ ) clusters: a combined experimental and density functional theory study

Kai Wang, ‡<sup>a</sup> Ze-Zhao Jia, ‡<sup>a</sup> Zheng Fan,<sup>a</sup> Hong-Yuan Zhao,<sup>a</sup> Guang-Jia Yin,<sup>a</sup> Ramiro Moro,<sup>a</sup> Bernd von  
Issendorff<sup>b</sup> and Lei Ma<sup>\*a</sup>

<sup>a</sup>Tianjin International Center for Nanoparticles and Nanosystems, Tianjin University, 92 Weijin  
Road, Nankai District, Tianjin 300072, China.

<sup>b</sup>Fakultät für Physik, Universität Freiburg, H. Herderstr. 3, D-79104 Freiburg, Germany

# These authors contributed equally

‡ Authors to whom correspondence should be addressed: E-mail: lei.ma@tju.edu.cn

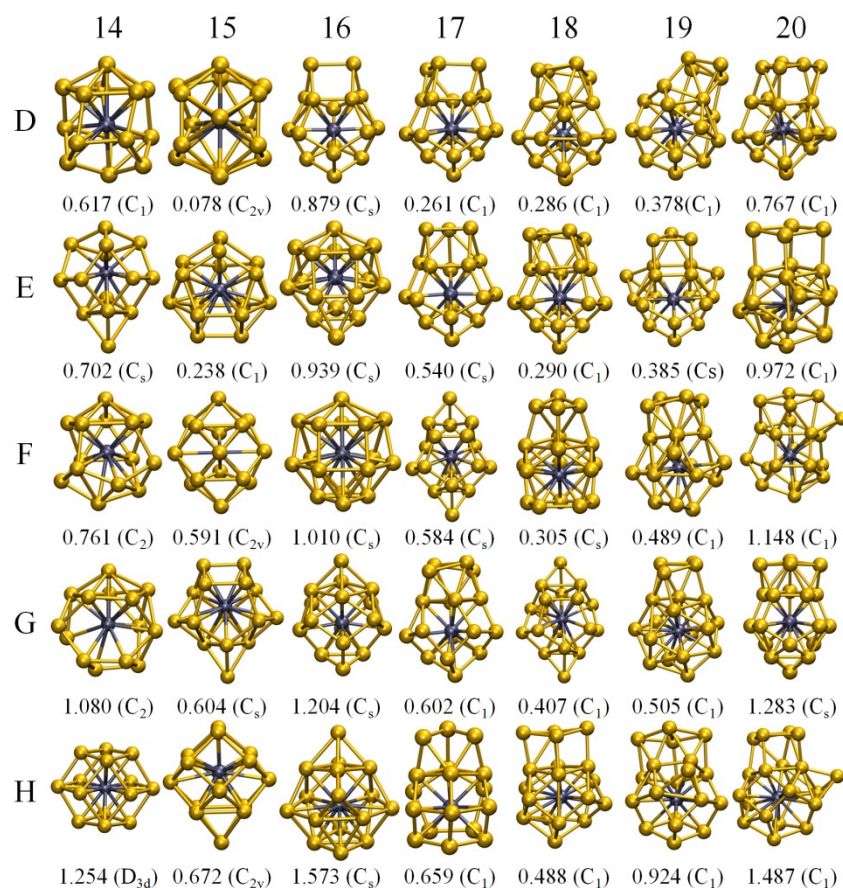

**FIG. S1.** Low-lying structures of  $\text{VSi}_n^-$  ( $n = 14\text{--}20$ ) clusters at B3P/cc-pVDZ level. For each structure, the total energy difference (eV) and the symmetry with respect to the lowest-energy isomer in main text are given. Grey and golden balls represent V and Si atoms, respectively.

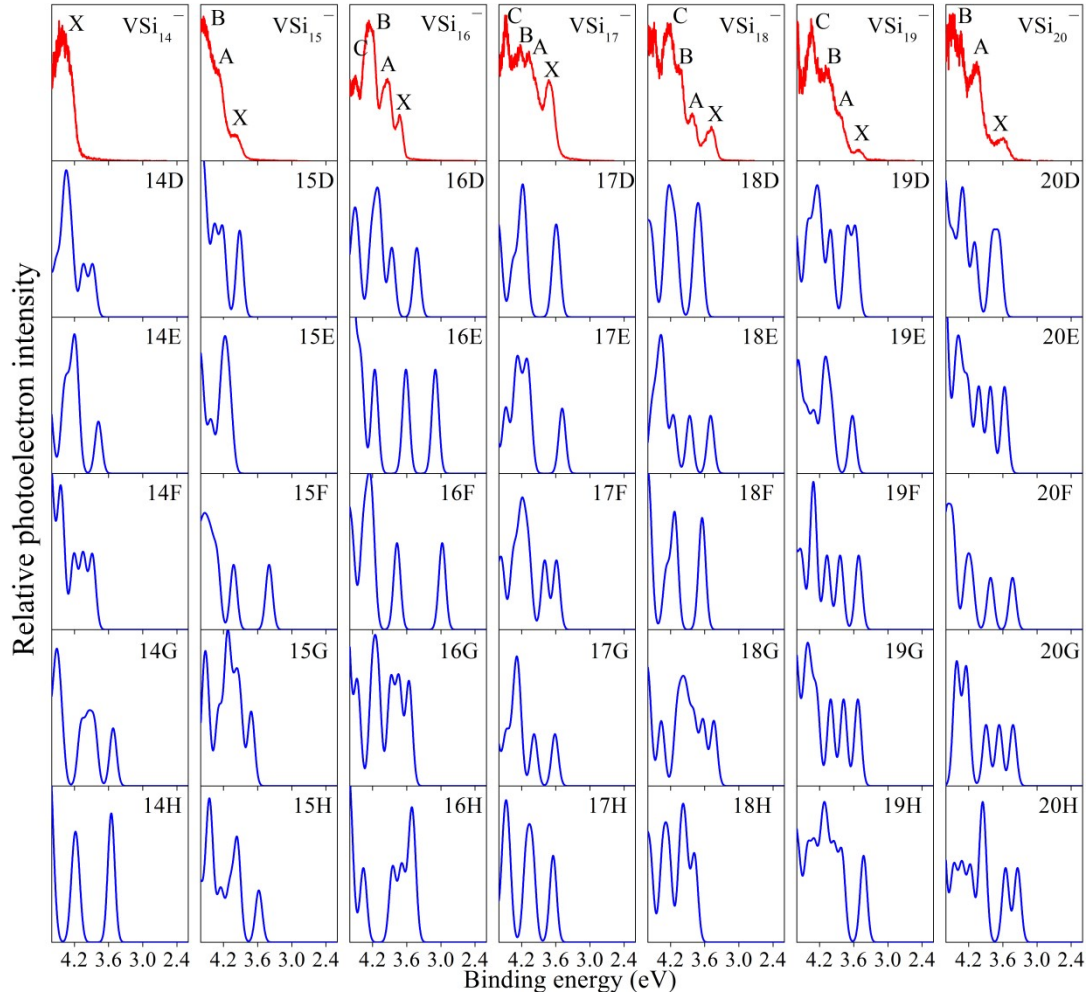

**FIG. S2.** Uppermost panels: experimental PES spectra of cold  $VSi_n^-$  ( $n = 14-20$ ), measured at a photon energy of 5.0 eV. Lower panels: theoretical PES spectra, calculated by density functional theory at the B3P/aug-cc-pVDZ level for the structures shown in Fig. S1.

#### Tests of functional and basis set

The performances of the functionals PBE, BLYP, BP86, PBE0, M06, M06-2X, and B3P with basis sets (aug-cc-pVDZ and def2-TZVPD) were also assessed by calculating the standard deviation (SD) of the differences between the calculated and measured VDEs where the SD is defined by the following formula:

$$SD = \sqrt{\frac{1}{7} \sum_{n=14}^{20} [Theo_{VDE}(n) - Expt_{VDE}(n)]^2} \quad (1)$$

Here,  $Theo_{VDE}(n)$  and the  $Expt_{VDE}(n)$  are the calculated and experimental measured VDEs for size  $n$ , respectively.

As shown in Tables S1 and S2, for the  $\text{VSi}_n^-$  ( $n = 14-20$ ) clusters, the aug-cc-pVDZ basis set is more suitable than def2-TZVPD for  $\text{VSi}_n^-$  ( $n = 14-20$ ) clusters, and the B3P/aug-cc-pVDZ is the most proper scheme to be used for calculating the electronic structure of  $\text{VSi}_n^-$  ( $n = 14-20$ ) due to the minimum discrepancies with the experimental measured ones. Therefore, the B3P/aug-cc-pVDZ scheme was adopted to calculate the relative energies and photoelectron spectra of  $\text{VSi}_n^-$  ( $n = 14-20$ ) clusters.

The experimental photoelectron spectra of the  $\text{VSi}_n^-$  ( $n = 14-20$ ) clusters were also used as references to evaluate the validity of the functionals and basis sets. In order to facilitate the comparison, the measured spectra and the simulated ones were integrated Figures S3 and S4.

Besides, in order to evaluate the influences of diffuse functions on the clusters structure determination, we have calculated the root mean square deviations (RMSD) of structures which are yielded by using basis sets with (aug-cc-pVDZ and def2-TZVPD) and without diffuse functions (cc-pVDZ and def2-TZVP) for the three isomers of 14A, 14B and 14C of  $\text{VSi}_{14}^-$ . The RMSD is defined by the following formula:

$$RMSD = \sqrt{\frac{1}{N} \sum_{i=1}^N \left[ (x_i - x_i')^2 + (y_i - y_i')^2 + (z_i - z_i')^2 \right]} \quad (2)$$

where  $x_i$ ,  $y_i$ , and  $z_i$  are the coordinates of the  $i$ th atom in the optimized structure by original basis set, while  $x_i'$ ,  $y_i'$ , and  $z_i'$  are the coordinates of the  $i$ th atom in the optimized structure by diffuse basis set, respectively.

The results (Table S3) indicate that diffuse functions have little effect on the structure determination.

Table S1. The experimentally (Expt.) measured VDEs and those theoretical predicted ones when using seven different functionals for the structures which are optimized at the def2-TZVP level and calculated at def2-TZVPD level. All energies are given in eV. The uncertainties of the experimental VDEs are shown in the parentheses.

| $n$ | PBE   | BLYP  | BP86  | PBE0  | M06   | M06-2X | B3P   | Expt.   |
|-----|-------|-------|-------|-------|-------|--------|-------|---------|
| 14  | 4.06  | 3.78  | 4.19  | 4.25  | 4.11  | 4.22   | 4.30  | 4.35(3) |
| 15  | 3.92  | 3.66  | 3.97  | 4.00  | 3.71  | 3.90   | 4.08  | 4.00(3) |
| 16  | 3.54  | 3.27  | 3.60  | 3.56  | 3.49  | 3.47   | 3.63  | 3.73(3) |
| 17  | 3.52  | 3.28  | 3.58  | 3.56  | 3.48  | 3.57   | 3.63  | 3.70(3) |
| 18  | 3.30  | 3.13  | 3.38  | 3.23  | 3.24  | 3.25   | 3.34  | 3.48(3) |
| 19  | 3.28  | 3.08  | 3.35  | 3.32  | 3.14  | 3.28   | 3.41  | 3.50(3) |
| 20  | 3.40  | 3.13  | 3.46  | 3.38  | 3.39  | 3.39   | 3.47  | 3.55(3) |
| SD  | 0.194 | 0.432 | 0.119 | 0.161 | 0.256 | 0.185  | 0.091 |         |

Table S2. The experimentally (Expt.) measured VDEs and those theoretical predicted ones when using seven different functionals for the structures which are optimized at the cc-pVDZ level and calculated at aug-cc-pVDZ level. All energies are given in eV.

The uncertainties of the experimental VDEs are shown in the parentheses.

| $n$ | PBE   | BLYP  | BP86  | PBE0  | M06   | M06-2X | B3P   | Expt.   |
|-----|-------|-------|-------|-------|-------|--------|-------|---------|
| 14  | 4.06  | 3.77  | 4.12  | 4.20  | 4.17  | 4.19   | 4.26  | 4.35(3) |
| 15  | 3.90  | 3.66  | 3.98  | 4.03  | 3.77  | 3.88   | 4.08  | 4.00(3) |
| 16  | 3.55  | 3.27  | 3.61  | 3.55  | 3.52  | 3.45   | 3.63  | 3.73(3) |
| 17  | 3.53  | 3.31  | 3.61  | 3.58  | 3.60  | 3.60   | 3.67  | 3.70(3) |
| 18  | 3.35  | 3.19  | 3.45  | 3.29  | 3.37  | 3.31   | 3.42  | 3.48(3) |
| 19  | 3.30  | 3.13  | 3.39  | 3.36  | 3.30  | 3.26   | 3.47  | 3.50(3) |
| 20  | 3.42  | 3.17  | 3.49  | 3.40  | 3.50  | 3.40   | 3.50  | 3.55(3) |
| SD  | 0.181 | 0.411 | 0.115 | 0.146 | 0.166 | 0.184  | 0.068 |         |

Table S3. The root mean square deviations (RMSD) for the three isomers of  $\text{VSi}_{14}^-$  between the structures which are optimized by using the cc-pVDZ (B1) and def2-TZVP (B3) as well as those by using cc-pVDZ (aug-cc-pVDZ, B2) and def2-TZVP (def2-TZVPD, B4).

|     |      | RMSD (Å) |    |        |    |
|-----|------|----------|----|--------|----|
|     |      | B1       | B2 | B3     | B4 |
| 14A | BP86 | 0.0005   | 0  | 0.0003 | 0  |
|     | PBE0 | 0.0005   | 0  | 0.0006 | 0  |
|     | B3P  | 0.0005   | 0  | 0.0004 | 0  |
| 14B | BP86 | 0.0004   | 0  | 0.0003 | 0  |
|     | PBE0 | 0.0005   | 0  | 0.0002 | 0  |
|     | B3P  | 0.0004   | 0  | 0.0001 | 0  |
| 14C | BP86 | 0.0005   | 0  | 0.0004 | 0  |
|     | PBE0 | 0.0007   | 0  | 0.0006 | 0  |
|     | B3P  | 0.0003   | 0  | 0.0004 | 0  |

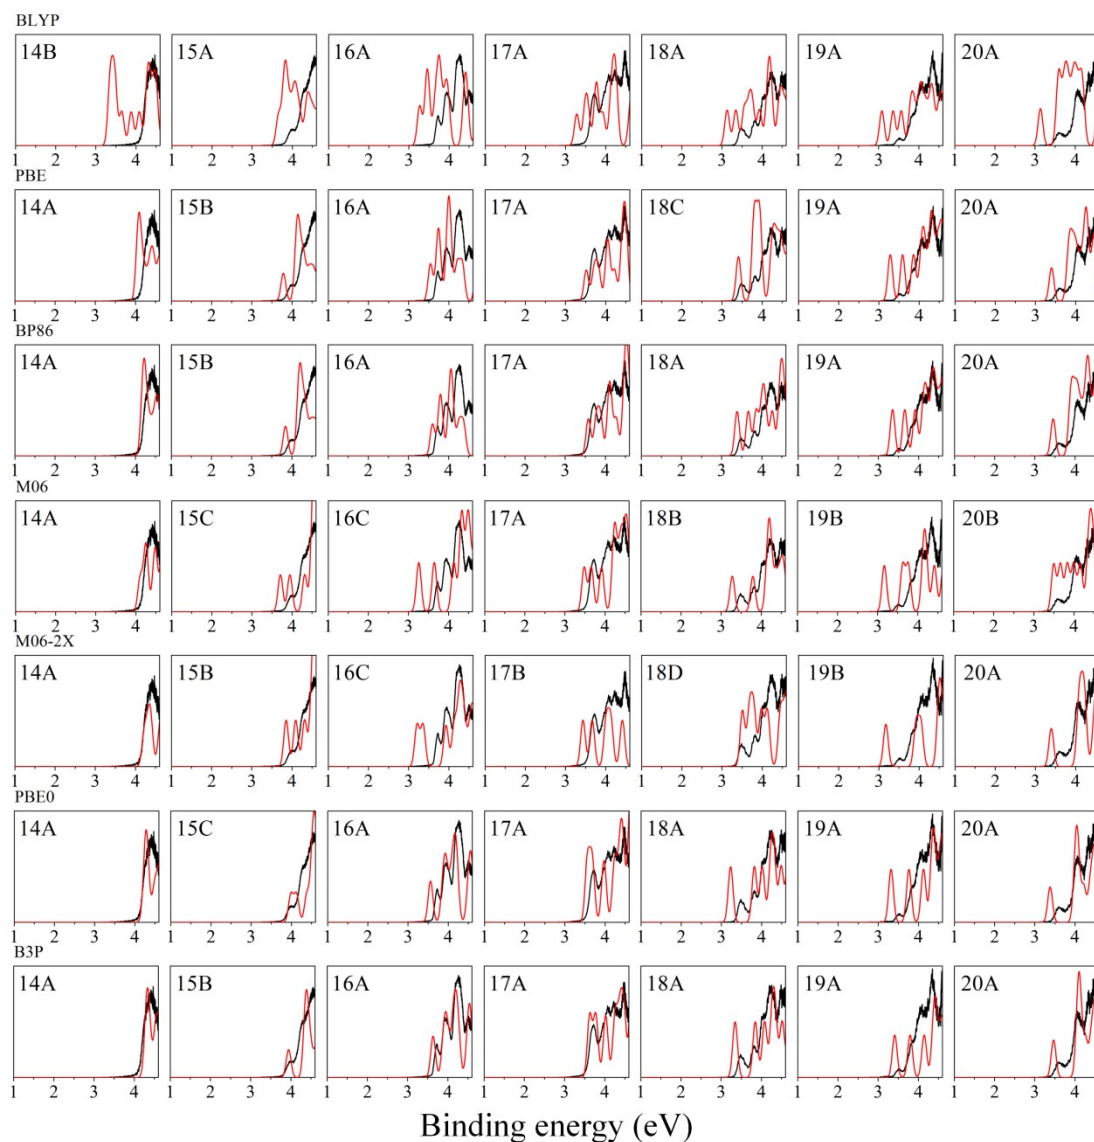

Fig. S3. Photoelectron spectra of cold ( $T = 10$  K)  $\text{VSi}_n^-$  ( $n = 14-20$ ) cluster anions, measured at a photon energy of 5.0 eV (black lines), in comparison with the simulated photoelectron spectra for the lowest energy structure found at a given functional (red lines) with the def2-TZVPD basis set.

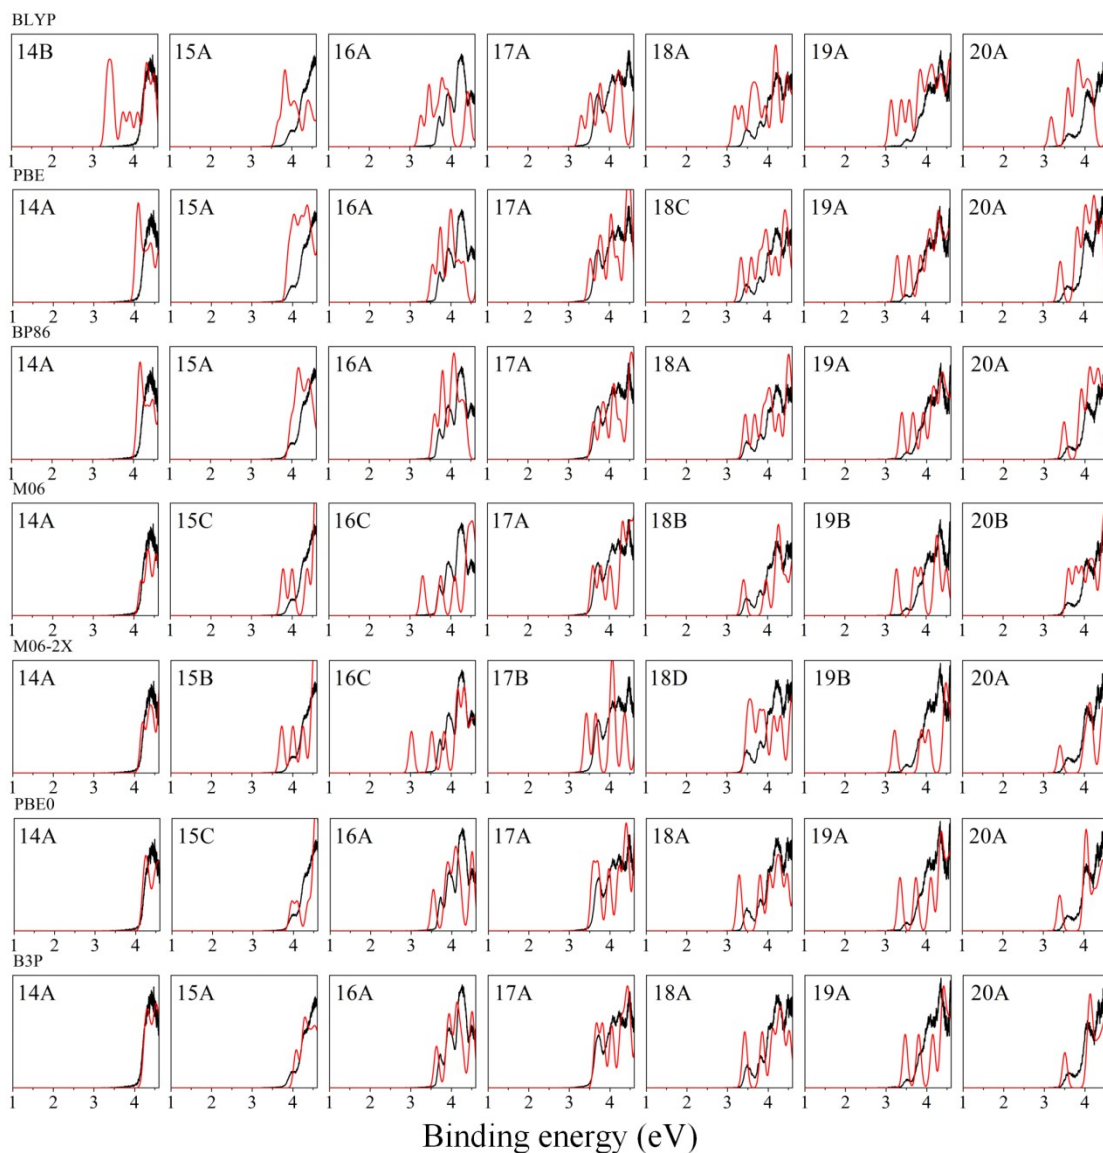

Fig. S4. Photoelectron spectra of cold ( $T = 10$  K)  $\text{VSi}_n^-$  ( $n = 14-20$ ) cluster anions, measured at a photon energy of 5.0 eV (black lines), in comparison with the simulated photoelectron spectra for the lowest energy structure found at a given functional (red lines) with the aug-cc-pVDZ basis set.
